# Supplementary material for: Overexpression of Bacterial Beta-Ketothiolase Improves Flax (Linum usitatissimum L.) Retting and Changes the Fibre Properties
Source: MDPI journal article supplement (doi:10.3390/metabo13030437), 2023-03-17
Supplement: s1 [file s1]

| <b>GENE</b>                                                                | <b>5'-Forward primer-3'</b> | <b>5'-Reverse primer-3'</b> |
|----------------------------------------------------------------------------|-----------------------------|-----------------------------|
| Primers for the reference gene                                             |                             |                             |
| ACTIN                                                                      | CCGGTGTTATGGTTGGAAT         | TGTAGAAAGTGTGATGCCAAA       |
| Primers amplifying the gene fragment encoding endogenous beta-ketothiolase |                             |                             |
| Lu_bKAT                                                                    | TTGCTTCCCAATTTGTCTACT       | ATTGAGATGACTCCGAAACG        |
| Primers amplifying the gene fragment encoding bacterial beta-ketothiolase  |                             |                             |
| phbA                                                                       | CCGGCAAGTTTGACGAAGAG        | GGCGTTGGCATAGCTCTTGA        |

Table S1
