# Supplementary figures and images for: Overexpression of Bacterial Beta-Ketothiolase Improves Flax (Linum usitatissimum L.) Retting and Changes the Fibre Properties
Source: MDPI journal article supplement (doi:10.3390/metabo13030437), 2023-03-17

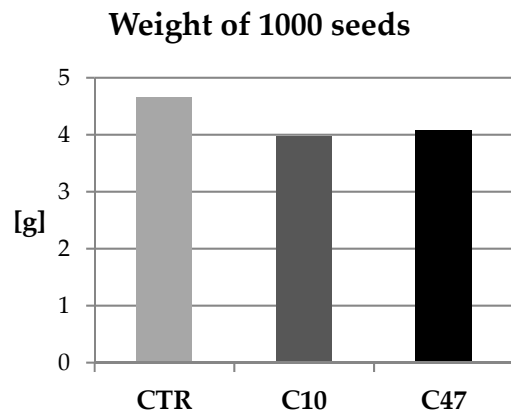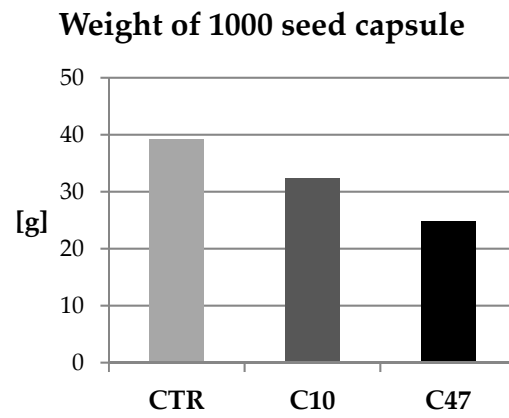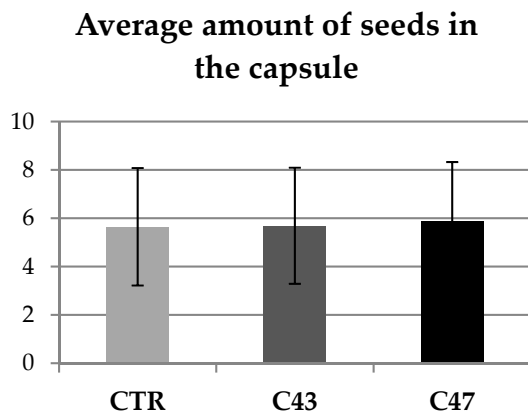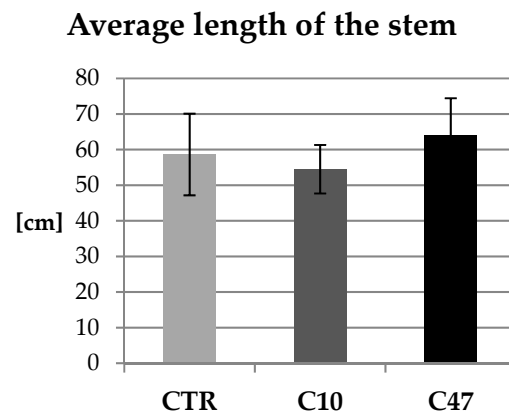

**Figure S2**

Supplement: s1 [file s1]

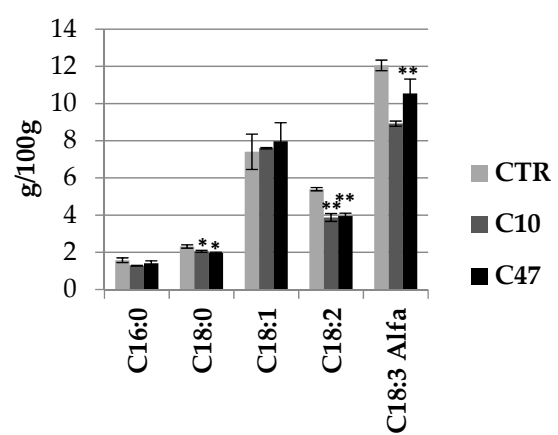

Figure S4

Supplement: s1 [file s1]

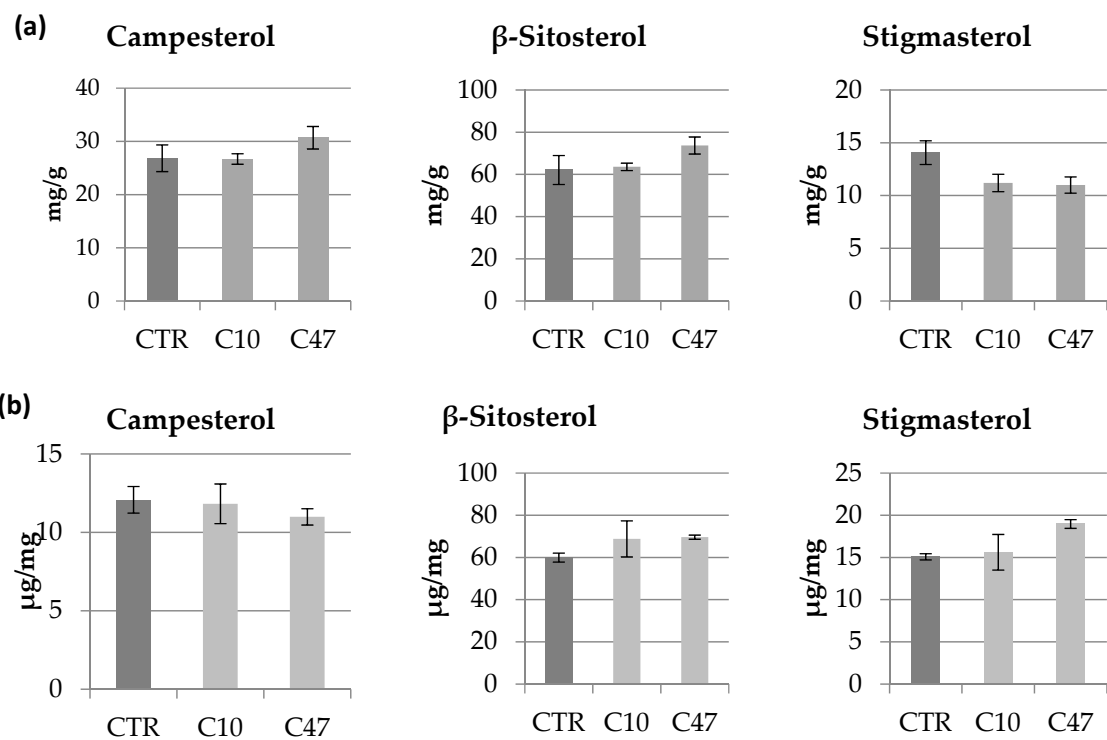

Figure S3

Supplement: s1 [file s1]

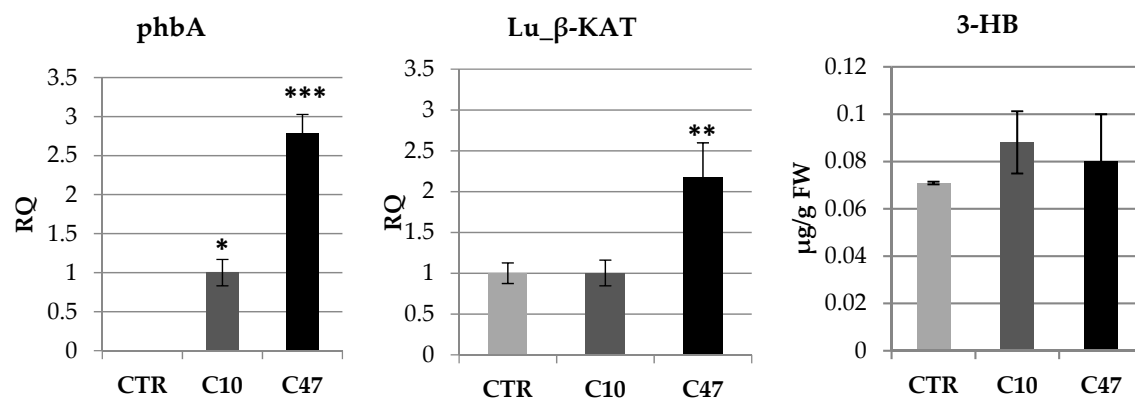

**Figure S1**

Supplement: s1 [file s1]

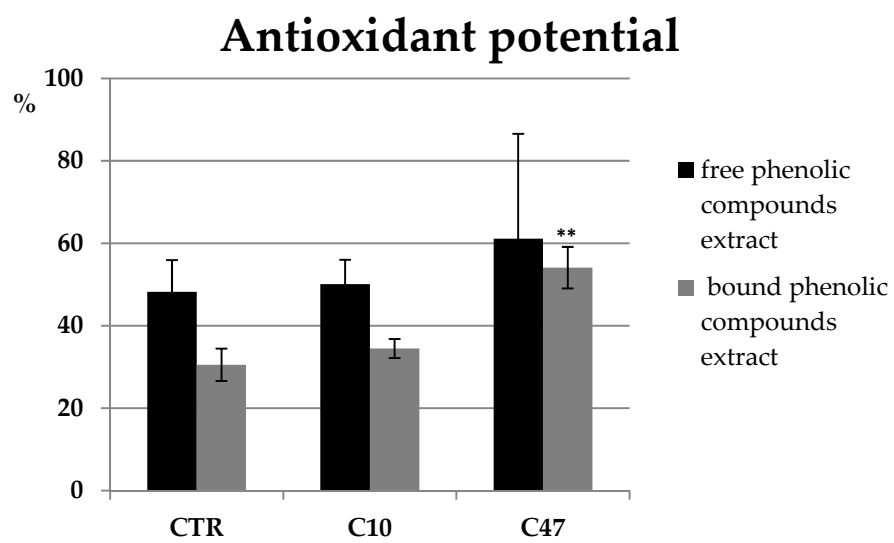

Figure S5

Supplement: s1 [file s1]
